# Supplementary material
Source: Elsevier journal article supplement (https://www.sciencedirect.com/science/article/pii/S1885585716304546)
Supplement: mmc1 [file S1885585716304546:mmc1.pdf]

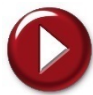

Supplementary material

Association Between Clinical Pathways Leading to Medical Management and Prognosis in Patients  
With Non-ST-Segment Elevation Acute Coronary Syndrome

**Table 1 of the Supplementary Material.** Factors Associated With Coronary Angiography During Index Hospitalization in NSTEMACS Patients in EPICOR. Model Adjusted for Hospital Type (Regional, non-University General, University General, Private) and Geographical Region, Using a Multi-level Model-adjustment For Clustering

| Variable                | Univariate analysis |             |          | Multivariable analysis <sup>a</sup> |          |
|-------------------------|---------------------|-------------|----------|-------------------------------------|----------|
|                         | No angiography      | Angiography | <i>P</i> | Odds ratio (95%CI)                  | <i>P</i> |
| <i>Type of hospital</i> |                     |             |          |                                     |          |
| Regional hospital       | 267 (22.5)          | 1022 (23.2) |          | 1.58 (0.68-3.64)                    |          |
| Nonuniversity general   | 379 (32.0)          | 1202 (27.3) |          | 0.55 (0.25-1.18)                    |          |
| University general      | 446 (37.6)          | 1719 (39.0) |          | 1.00 (reference)                    |          |

|                                            |            |             |        |                  |        |
|--------------------------------------------|------------|-------------|--------|------------------|--------|
| Private                                    | 94 (7.9)   | 462 (10.5)  |        | 2.69 (0.80-9.04) |        |
| <i>Geographical region</i>                 |            |             |        |                  |        |
| Eastern Europe                             | 298 (25.1) | 919 (20.9)  |        | 0.15 (0.06-0.35) |        |
| Latin America                              | 392 (33.1) | 602 (13.7)  |        | 0.04 (0.02-0.11) |        |
| Western Europe (North)                     | 311 (26.2) | 1860 (42.2) |        | 1.00 (reference) |        |
| Western Europe (South)                     | 185 (15.6) | 1024 (23.2) |        | 1.08 (0.47-2.47) |        |
| <i>Patient characteristics<sup>b</sup></i> |            |             |        |                  |        |
| NSTEMI                                     | 725 (61.1) | 3248 (73.7) | <.0001 | 1.57 (1.14-2.15) | .0051  |
| Age > 75 y                                 | 346 (29.2) | 766 (17.4)  | <.0001 | 0.38 (0.28-0.53) | <.0001 |
| Male                                       | 750 (63.2) | 3226 (73.2) | <.0001 |                  |        |
| Hypertension                               | 874 (74.3) | 2813 (64.7) | <.0001 |                  |        |
| Hypercholesterolemia                       | 617 (55.0) | 2327 (54.7) | .8514  |                  |        |
| Diabetes mellitus                          | 412 (35.2) | 1093 (25.1) | <.0001 |                  |        |
| Current smoking                            | 451 (41.2) | 1396 (34.0) | <.0001 | 0.67 (0.51-0.88) | .0037  |
| Glucose > 160 mg/dL                        | 294 (26.8) | 729 (19.4)  | <.0001 |                  |        |

|                              |            |             |        |                  |        |
|------------------------------|------------|-------------|--------|------------------|--------|
| Serum creatinine > 1.2 mg/dL | 534 (46.9) | 2060 (49.6) | .1024  |                  |        |
| Hemoglobin < 13 mg/dL        | 401 (35.5) | 923 (22.6)  | <.0001 | 0.65 (0.48-0.87) | .0034  |
| Prior CVD                    | 695 (58.8) | 1965 (45.0) | <.0001 |                  |        |
| Prior MI                     | 428 (36.5) | 1030 (23.7) | <.0001 | 0.56 (0.39-0.78) | .0009  |
| Prior PCI                    | 195 (16.7) | 967 (22.3)  | <.0001 | 1.58 (1.07-2.32) | .0209  |
| Prior CABG                   | 130 (11.0) | 401 (9.2)   | .0568  | 0.60 (0.38-0.94) | .0249  |
| Heart failure                | 188 (16.1) | 229 (5.3)   | <.0001 | 0.30 (0.19-0.49) | <.0001 |
| Atrial fibrillation          | 117 (10.0) | 251 (5.8)   | <.0001 |                  |        |
| TIA/stroke                   | 98 (8.3)   | 267 (6.1)   | .007   |                  |        |
| PVD                          | 92 (8.0)   | 291 (6.7)   | .1262  |                  |        |
| Aspirin                      | 571 (48.2) | 1884 (42.8) | .0009  |                  |        |
| Clopidogrel                  | 211 (17.8) | 621 (14.1)  | .0015  |                  |        |
| Anticoagulants               | 84 (7.1)   | 183 (4.2)   | <.0001 |                  |        |
| ACE inhibitors/ARBs          | 645 (54.5) | 1861 (42.4) | <.0001 | 0.70 (0.53-0.92) | .0096  |
| Beta-blocker                 | 533 (45.0) | 1670 (38.0) | <.0001 |                  |        |

|                                                           |            |             |        |                     |         |
|-----------------------------------------------------------|------------|-------------|--------|---------------------|---------|
| Statins                                                   | 473 (40.2) | 1747 (39.7) | .8018  |                     |         |
| <i>Presence of catheterization laboratory in hospital</i> | 538 (45.4) | 3715 (84.3) | <.0001 | 46.76 (22.40-97.58) | <0.0001 |
| <i>Terms relating hospital level clustering</i>           |            |             |        |                     |         |
| Standard deviation of random effect term                  |            |             |        | 2.56                | <0.0001 |

ACE, angiotensin-converting enzyme; ARB, angiotensin receptor blocker; CABG, coronary artery bypass graft; 95%CI, 95% confidence interval; CV, cardiovascular; CVD, cardiovascular disease; MI, myocardial infarction; NSTEMI, non-ST-segment elevation acute coronary syndrome; NSTEMI, non-ST-segment elevation myocardial infarction; PAD, peripheral arterial disease; PCI, percutaneous coronary intervention; TIA, transient ischemic attack.

<sup>a</sup>Terms were selected using stepwise variable selection, except hospital type and geographical region, which were forced into the multivariable model

<sup>b</sup>Medications are chronic CV medications (ie, patients were taking these before index event).

**Table 2 of the Supplementary Material.** Factors Associated With Coronary Revascularization During Index Hospitalization in NSTEMI Patients Who Received Coronary Angiography and Had Significant Coronary Artery Disease. Model Adjusted for Hospital Type (Regional, non-University General, University General, Private) and Geographical Region, Using A Multi-Level Model-Adjustment for Clustering

| Variable                   | Univariate analysis |             |          | Multivariable analysis <sup>a</sup> |          |
|----------------------------|---------------------|-------------|----------|-------------------------------------|----------|
|                            | No angiography      | Angiography | <i>P</i> | Odds ratio (95%CI)                  | <i>P</i> |
| <i>Type of hospital</i>    |                     |             |          |                                     |          |
| Regional hospital          | 150 (22.4)          | 776 (23.6)  |          | 1.10 (0.74-1.63)                    |          |
| Non-university general     | 181 (27.1)          | 900 (27.4)  |          | 1.06 (0.73-1.54)                    |          |
| University general         | 256 (38.3)          | 1281 (39.0) |          | 1.00 (reference)                    |          |
| Private                    | 82 (12.3)           | 328 (10.0)  |          | 2.19 (1.14-4.20)                    |          |
| <i>Geographical region</i> |                     |             |          |                                     |          |
| Eastern Europe             | 186 (27.8)          | 649 (19.8)  |          | 0.50 (0.33-0.77)                    |          |
| Latin America              | 137 (20.5)          | 386 (11.8)  |          | 0.29 (0.18-0.48)                    |          |
| Western Europe (North)     | 236 (35.3)          | 1420 (43.2) |          | 1.00 (reference)                    |          |

|                                            |            |             |        |                  |        |
|--------------------------------------------|------------|-------------|--------|------------------|--------|
| Western Europe (South)                     | 110 (16.4) | 830 (25.3)  |        | 1.10 (0.73-1.66) |        |
| <i>Patient characteristics<sup>b</sup></i> |            |             |        |                  |        |
| NSTEMI                                     | 454 (67.9) | 2491 (75.8) | <.0001 |                  |        |
| Age > 75 y                                 | 139 (20.8) | 559 (17.0)  | .0201  | 0.73 (0.55-0.98) | .0348  |
| Male sex                                   | 484 (72.3) | 2513 (76.5) | .0223  | 1.34 (1.04-1.72) | .0217  |
| Hypertension                               | 466 (70.4) | 2084 (64.3) | .0026  |                  |        |
| Hypercholesterolemia                       | 399 (61.8) | 1716 (54.2) | .0004  |                  |        |
| Diabetes mellitus                          | 213 (32.1) | 800 (24.7)  | .0001  |                  |        |
| Current smoking                            | 221 (35.6) | 996 (32.5)  | .1338  |                  |        |
| Glucose > 160 mg/dL                        | 136 (23.4) | 548 (19.4)  | .028   |                  |        |
| Serum creatinine > 1.2 mg/dL               | 319 (50.4) | 1523 (49.1) | .5567  | 0.76 (0.58-0.99) | .0443  |
| Hemoglobin < 13 mg/dL                      | 174 (28.3) | 656 (21.4)  | .0002  |                  |        |
| Prior CVD                                  | 399 (60.4) | 1372 (42.1) | <.0001 | 0.53 (0.42-0.67) | <.0001 |
| Prior MI                                   | 213 (32.6) | 730 (22.5)  | <.0001 |                  |        |
| Prior PCI                                  | 165 (25.2) | 710 (21.9)  | .0645  |                  |        |

|                                                           |                   |                    |              |                  |        |
|-----------------------------------------------------------|-------------------|--------------------|--------------|------------------|--------|
| Prior CABG                                                | 120 (18.2)        | 267 (8.2)          | <.0001       | 0.45 (0.32-0.63) | <.0001 |
| Heart failure                                             | 46 (7.0)          | 158 (4.9)          | .027         |                  |        |
| Atrial fibrillation                                       | 54 (8.2)          | 158 (4.9)          | .0006        |                  |        |
| TIA/stroke                                                | 48 (7.3)          | 197 (6.1)          | .2363        |                  |        |
| PVD                                                       | 62 (9.5)          | 212 (6.6)          | .0087        |                  |        |
| Aspirin                                                   | 365 (54.6)        | 1347 (41.0)        | <.0001       |                  |        |
| Clopidogrel                                               | 112 (16.8)        | 435 (13.3)         | .0167        |                  |        |
| Anticoagulants                                            | 34 (5.1)          | 122 (3.7)          | .0975        |                  |        |
| ACE inhibitors/ARBs                                       | 316 (47.4)        | 1358 (41.5)        | .0048        |                  |        |
| Beta-blocker                                              | 303 (45.3)        | 1208 (36.9)        | <.0001       |                  |        |
| Statins                                                   | 301 (45.0)        | 1272 (38.8)        | .0029        |                  |        |
| <i>Presence of catheterization laboratory in hospital</i> | <i>579 (86.5)</i> | <i>2775 (84.5)</i> | <i>.1733</i> |                  |        |
| <i>Terms relating-hospital level clustering</i>           |                   |                    |              |                  |        |
| Standard deviation of random effect term                  |                   |                    |              | 0.83             | <.0001 |

ACE, angiotensin-converting enzyme; ARB, angiotensin receptor blocker; CABG, coronary artery bypass graft; 95%CI, 95% confidence interval; CV, cardiovascular; CVD, cardiovascular disease; MI, myocardial infarction; NSTEACS, non–ST-segment elevation acute coronary syndrome; NSTEMI, non–ST-segment elevation myocardial infarction; PAD, peripheral arterial disease; PCI, percutaneous coronary intervention; TIA, transient ischemic attack.

<sup>a</sup>Terms selected using stepwise variable selection, except hospital type and geographical region, which were forced into the multivariable model.

<sup>b</sup>Medications are chronic CV medications (ie, patients were taking these before index event).



**Table 3 of the Supplementary Material.** Hazard Ratios for All-cause Death for Subgroups of Medically Managed vs Revascularized NSTEMI Patients by Management Strategy

| Treatment                             | Model 1          | Model 2          | Model 3          |
|---------------------------------------|------------------|------------------|------------------|
| <b>Medical management</b>             |                  |                  |                  |
| <i>Coronary revascularization</i>     | 1.00 (reference) | 1.00 (reference) | 1.00 (reference) |
| CAG-                                  | 3.30 (2.54-4.27) | 2.52 (1.94-3.27) | 1.81 (1.23-2.65) |
| CAG+ CAD+                             | 2.12 (1.54-2.92) | 1.88 (1.36-2.58) | 1.90 (1.23-2.95) |
| CAG+ CAD-                             | 0.86 (0.50-1.47) | 0.96 (0.56-1.64) | 0.68 (0.21-2.21) |
| <i>Type of hospital</i>               |                  |                  |                  |
| University general                    | 1.00 (reference) | 1.00 (reference) | 1.00 (reference) |
| Non-university general                | 1.08 (0.81-1.44) | 1.06 (0.80-1.41) | 1.01 (0.69-1.48) |
| Private                               | 0.89 (0.58-1.36) | 0.77 (0.50-1.19) | 0.48 (0.23-0.98) |
| Regional hospital                     | 0.95 (0.69-1.31) | 0.89 (0.65-1.23) | 0.95 (0.62-1.46) |
| <i>Geographical region</i>            |                  |                  |                  |
| Western Europe (North)                | 1.00 (reference) | 1.00 (reference) | 1.00 (reference) |
| Western Europe (South)                | 1.43 (1.03-1.99) | 1.31 (0.94-1.83) | 1.82 (1.07-3.11) |
| Eastern Europe                        | 1.33 (0.96-1.85) | 1.86 (1.33-2.58) | 2.09 (1.24-3.53) |
| Latin America                         | 1.51 (1.06-2.15) | 1.94 (1.36-2.76) | 3.55 (1.98-6.37) |
| <i>EPICOR predictors of mortality</i> |                  |                  |                  |
| Age (per 10 y)                        | -                | 1.95 (1.75-2.17) | 1.53 (1.30-1.80) |
| Male sex                              | -                | 0.73 (0.58-0.93) | 0.72 (0.50-1.03) |
| LVEF (per 10% higher)                 | -                | -                | 0.97 (0.96-0.98) |
| EQ5D (per unit higher)                | -                | -                | 1.13 (1.04-1.22) |
| Serum creatinine (< 1.2 mg/dL)        | -                | -                | 1.18 (0.84-1.66) |

|                                                           |      |      |                  |
|-----------------------------------------------------------|------|------|------------------|
| Glucose > 160 mg/dL                                       | -    | -    | 1.39 (1.00-1.93) |
| Chronic obstructive pulmonary disease                     | -    | -    | 0.95 (0.57-1.59) |
| Hemoglobin < 13 g/dL                                      | -    | -    | 1.91 (1.36-2.67) |
| Peripheral vascular disease                               | -    | -    | 0.96 (0.59-1.56) |
| On diuretics at discharge                                 | -    | -    | 1.56 (1.10-2.21) |
| <i>Terms relating-hospital level clustering of events</i> |      |      |                  |
| Estimated gamma frailty term                              | 0.16 | 0.15 | 0.07             |
| <i>P</i> -value for shared frailty                        | .023 | .027 | .30              |

CAD, coronary artery disease; CAG, coronary angiography; LVEF, left ventricular ejection fraction; NSTEMI, non-ST-segment elevated acute coronary syndrome.
